# Supplementary material for: Identification of novel antioxidant peptides from sea squirt (Halocynthia roretzi) and its neuroprotective effect in 6-OHDA-induced neurotoxicity
Source: Royal Society of Chemistry journal article supplement (doi:10.1039/d2fo00729k), 2022-01-01
Supplement: d2fo00729k1.pdf [file d2fo00729k1.pdf]

## Supplementary materials

Figure S1. The total ion chromatogram of mass spectrometry.

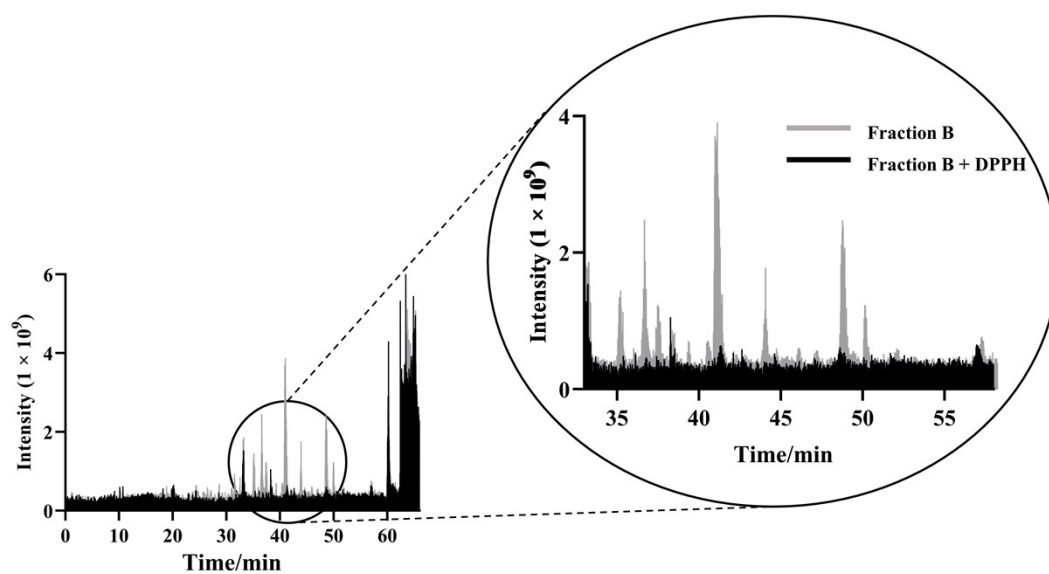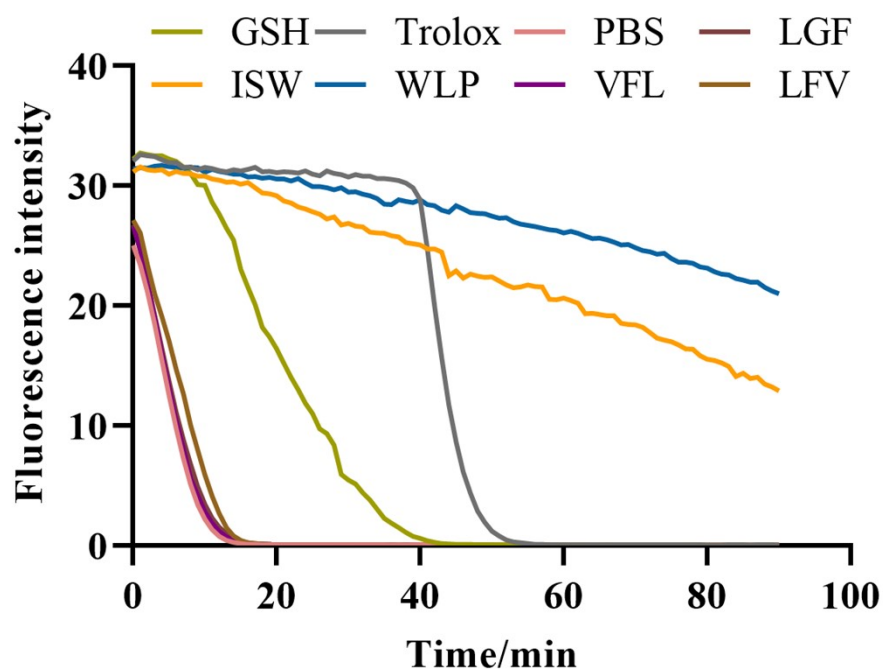

Figure S2. Fluorescence decay curves of six antioxidant peptides treated with AAPH in the ORAC assay.
