# Supplementary material for: Identification of novel antioxidant peptides from sea squirt (Halocynthia roretzi) and its neuroprotective effect in 6-OHDA-induced neurotoxicity
Source: Royal Society of Chemistry journal article supplement (doi:10.1039/d2fo00729k), 2022-01-01
Supplement: d2fo00729k2.xlsx [file d2fo00729k2.xlsx]

## Sheet: Fraction B
Table S1. Identification result of fraction B and fraction B1 by LC-MS/MS.
Fraction B identified 243 peptides
Peptide	Mass	Score	Protein Name	Scan Time	intensity
WVP	401.218	234.62	Isoleucyl-tRNA synthetase OS=Ciona intestinalis OX=7719 PE=3 SV=2	38.3599	11235000
WPI	415.234	119.19	Rap-GAP domain-containing protein OS=Ciona intestinalis OX=7719 PE=4 SV=2	51.6297	29982000
VIPT	429.271	112.7	Uncharacterized protein OS=Ciona intestinalis OX=7719 GN=LOC100179130 PE=3 SV=2	21.5048	2474400
TYF	430.197	220.96	Sodium channel protein OS=Ciona intestinalis OX=7719 PE=3 SV=2	37.5188	3164500
MFF	444.195	147.06	Uncharacterized protein OS=Ciona intestinalis OX=7719 PE=4 SV=1	56.5325	4568000
LFV	378.239	226.65	NADH:ubiquinone reductase (H(+)-translocating) OS=Polycarpa mytiligera OX=569436 GN=nad5 PE=4 SV=1	40.5708	185134000
LFNK	521.308	144.55	Component of oligomeric Golgi complex 2 OS=Ciona intestinalis OX=7719 PE=3 SV=1	62.5012	44998000
IWQ	446.24	121.56	Rap-GAP domain-containing protein OS=Ciona intestinalis OX=7719 PE=4 SV=2	27.4457	4884100
GWP	359.171	109.12	Uncharacterized protein OS=Ciona intestinalis OX=7719 PE=3 SV=2	36.996	17403000
FNR	443.192	155.35	Dolichyl-diphosphooligosaccharide--protein glycotransferase OS=Ciona intestinalis OX=7719 GN=LOC100177361 PE=3 SV=2	33.0595	44562600
WLQ	446.24	154.19	NADH-ubiquinone oxidoreductase chain 5 OS=Halocynthia spinosa OX=569430 GN=nad5 PE=3 SV=1	30.0013	17862000
WGY	425.182	103.48	NADH:ubiquinone reductase (H(+)-translocating) OS=Polycarpa mytiligera OX=569436 GN=nad5 PE=4 SV=1	41.2643	4711500
EFF	442.197	141.39	Uncharacterized protein OS=Ciona intestinalis OX=7719 PE=4 SV=1	49.1218	202674000
YTE	412.171	137.8	Dolichyl-diphosphooligosaccharide--protein glycotransferase OS=Ciona intestinalis OX=7719 GN=LOC100177361 PE=3 SV=2	27.4052	8201800
YFN	443.192	140.37	Uncharacterized protein OS=Ciona intestinalis OX=7719 PE=4 SV=1	22.9583	2816400
LWG	375.203	116.29	Uncharacterized protein OS=Ciona intestinalis OX=7719 PE=4 SV=1	32.6183	390060000
LPW	415.234	211.7	Uncharacterized protein OS=Ciona intestinalis OX=7719 GN=ci-zf(c2h2)-87 PE=4 SV=1	47.8591	172063000
LLTW	532.313	152.23	Cytochrome b OS=Polycarpa mytiligera OX=569436 GN=cob PE=3 SV=1	52.5799	1669200
LFQ	407.229	134.57	NADH:ubiquinone reductase (H(+)-translocating) OS=Polycarpa mytiligera OX=569436 GN=nad5 PE=4 SV=1	22.8886	2704700
IPY	392.218	133.24	Cytochrome b OS=Polycarpa mytiligera OX=569436 GN=cob PE=3 SV=1	30.9967	7212200
FVP	362.207	219.36	Uncharacterized protein OS=Ciona intestinalis OX=7719 PE=4 SV=1	28.8931	28014800
FSSS	439.219	116.58	3-oxoacyl-[acyl-carrier-protein] reductase OS=Ciona intestinalis OX=7719 PE=4 SV=1	52.1715	1305600
FSP	350.171	221.15	Uncharacterized protein OS=Ciona intestinalis OX=7719 GN=ci-zf(c2h2)-87 PE=4 SV=1	22.9829	18703000
FLH	416.229	140.21	Cytochrome b OS=Polycarpa mytiligera OX=569436 GN=cob PE=3 SV=1	15.6439	1269600
FGF	370.176	144.28	NADH:ubiquinone reductase (H(+)-translocating) OS=Polycarpa mytiligera OX=569436 GN=nad5 PE=4 SV=1	50.1929	334535300
YDFYQ	735.298	195.03	C3a anaphylatoxin chemotactic receptor-like OS=Phallusia mammillata OX=59560 GN=C3ar1 PE=2 SV=1	44.1145	14337000
WLL	431.265	154	Rap-GAP domain-containing protein OS=Ciona intestinalis OX=7719 PE=4 SV=2	59.565	1588500
Fraction B identified 243 peptides
Peptide	Mass	Score	Protein Name	Scan Time	intensity
WAL	389.218	115.48	Uncharacterized protein OS=Ciona intestinalis OX=7719 PE=4 SV=1	49.5614	23772000
VPW	401.218	190.62	Sodium channel protein OS=Ciona intestinalis OX=7719 PE=3 SV=2	43.5315	158064000
VGF	322.176	179.55	Uncharacterized protein OS=Ciona intestinalis OX=7719 PE=4 SV=1	31.4029	17185000
TPW	403.198	171.46	Isoleucyl-tRNA synthetase OS=Ciona intestinalis OX=7719 PE=3 SV=2	35.1009	35234800
LIYF	555.318	184.98	Peptidase_M28 domain-containing protein OS=Ciona intestinalis OX=7719 PE=4 SV=1	58.1496	2876000
INF	393.213	163.75	Uncharacterized protein OS=Ciona intestinalis OX=7719 GN=LOC100179130 PE=3 SV=2	42.0172	15294900
IDAP	415.219	133.72	Uncharacterized protein OS=Ciona intestinalis OX=7719 PE=4 SV=1	21.573	1754500
GSPW	446.203	281.67	Body wall muscle protein HR-29 OS=Halocynthia roretzi OX=7729 PE=1 SV=2	34.4196	5727900
FLVH	515.298	156.47	Acetyl-CoA carboxylase OS=Ciona intestinalis OX=7719 PE=4 SV=2	24.2948	7875000
YGY	402.166	131.34	Uncharacterized protein OS=Ciona intestinalis OX=7719 PE=4 SV=1	25.4268	25215600
WSI	405.213	110.34	NADH:ubiquinone reductase (H(+)-translocating) OS=Polycarpa mytiligera OX=569436 GN=nad5 PE=4 SV=1	49.0749	16815000
WNL	432.224	115.21	Rap-GAP domain-containing protein OS=Ciona intestinalis OX=7719 PE=4 SV=2	49.2502	9013700
VYYP	541.266	222.63	Uncharacterized protein OS=Ciona intestinalis OX=7719 PE=4 SV=1	34.0705	4713000
QLF	407.229	101.7	Uncharacterized protein OS=Ciona intestinalis OX=7719 GN=ci-zf(c2h2)-87 PE=4 SV=1	38.3118	2569800
PYTPTT	679.33	154.15	Uncharacterized protein LOC100175270 OS=Phallusia mammillata OX=59560 GN=LOC100175270 PE=2 SV=1	26.6617	6132800
PYGF	483.224	142.49	Peptidase_M28 domain-containing protein OS=Ciona intestinalis OX=7719 PE=4 SV=1	41.9449	12143000
MYF	460.19	105	Dolichyl-diphosphooligosaccharide--protein glycotransferase OS=Ciona intestinalis OX=7719 GN=LOC100177361 PE=3 SV=2	48.0371	1706600
LVFL	491.323	140.32	Uncharacterized protein OS=Ciona intestinalis OX=7719 PE=4 SV=1	57.0346	5972300
LPV	328.223	122.16	Rap-GAP domain-containing protein OS=Ciona intestinalis OX=7719 PE=4 SV=2	27.0787	3922800
ISF	366.202	244.56	NADH:ubiquinone reductase (H(+)-translocating) OS=Polycarpa mytiligera OX=569436 GN=nad5 PE=4 SV=1	41.9476	56883000
FNF	427.198	166.03	Uncharacterized protein OS=Ciona intestinalis OX=7719 GN=ci-zf(c2h2)-87 PE=4 SV=1	47.4379	53244000
FLY	442.234	161.18	NADH:ubiquinone reductase (H(+)-translocating) OS=Polycarpa mytiligera OX=569436 GN=nad5 PE=4 SV=1	42.0844	6936800
FIR	435.271	133.29	Uncharacterized protein OS=Ciona intestinalis OX=7719 GN=ci-zf(c2h2)-87 PE=4 SV=1	15.0445	42376400
FAL	350.207	143.71	NADH:ubiquinone reductase (H(+)-translocating) OS=Polycarpa mytiligera OX=569436 GN=nad5 PE=4 SV=1	45.6339	106685000
WPG	359.171	108.55	DUF3677 domain-containing protein OS=Ciona intestinalis OX=7719 PE=4 SV=1	30.2817	81806000
VYF	428.218	173.12	Uncharacterized protein OS=Ciona intestinalis OX=7719 PE=4 SV=1	42.81	103190000
VIMA	433.248	114.77	Protein transport protein Sec61 subunit alpha OS=Halocynthia roretzi OX=7729 PE=2 SV=1	37.6829	5112300
VGPK	400.255	143.21	Uncharacterized protein OS=Ciona intestinalis OX=7719 PE=4 SV=1	17.9584	1633900
Fraction B identified 243 peptides
Peptide	Mass	Score	Protein Name	Scan Time	intensity
VFL	378.239	206.97	NADH:ubiquinone reductase (H(+)-translocating) OS=Polycarpa mytiligera OX=569436 GN=nad5 PE=4 SV=1	45.3569	122566800
SLW	405.213	112.89	Uncharacterized protein OS=Ciona intestinalis OX=7719 PE=4 SV=1	44.8011	18564000
PGW	359.171	164.76	Delta(24)-sterol reductase OS=Ciona intestinalis OX=7719 GN=LOC100181233 PE=4 SV=1	33.4463	35545000
LYYL	571.313	146.62	Sodium channel protein OS=Ciona intestinalis OX=7719 PE=3 SV=2	49.467	2834800
LWL	431.265	106.61	NADH:ubiquinone reductase (H(+)-translocating) OS=Polycarpa mytiligera OX=569436 GN=nad5 PE=4 SV=1	57.7444	10239700
LFH	416.229	154.41	Uncharacterized protein OS=Ciona intestinalis OX=7719 PE=4 SV=1	15.306	10392000
IGYP	449.24	286.42	Acetyl-CoA carboxylase OS=Ciona intestinalis OX=7719 PE=4 SV=2	31.5791	7197000
IFD	435.271	163.83	Peptidase_M28 domain-containing protein OS=Ciona intestinalis OX=7719 PE=4 SV=1	14.9765	18621300
FRY	485.251	174.78	Frizzled-4 OS=Ciona intestinalis OX=7719 GN=Ci-Fz4 PE=2 SV=1	24.4199	1992200
C[+57.021]IP	389.185	102.8	Cytochrome b OS=Polycarpa mytiligera OX=569436 GN=cob PE=3 SV=1	35.9677	1449600
YPI	392.218	109.77	Uncharacterized protein OS=Ciona intestinalis OX=7719 GN=ci-zf(c2h2)-87 PE=4 SV=1	34.6226	4344800
VTF	366.202	169.95	Uncharacterized protein OS=Ciona intestinalis OX=7719 PE=4 SV=1	33.3333	12059000
LTPL	443.286	157.57	Uncharacterized protein OS=Ciona intestinalis OX=7719 PE=4 SV=1	41.9354	1347200
LHY	432.224	233.23	Isoleucyl-tRNA synthetase OS=Ciona intestinalis OX=7719 PE=3 SV=2	17.386	81985900
LGLGY	522.292	224.98	Uncharacterized protein OS=Ciona intestinalis OX=7719 GN=LOC101242989 PE=4 SV=2	47.8878	3805200
LGF	336.192	131.54	NADH:ubiquinone reductase (H(+)-translocating) OS=Polycarpa mytiligera OX=569436 GN=nad5 PE=4 SV=1	40.5421	264488000
LFP	376.223	251.57	Uncharacterized protein OS=Ciona intestinalis OX=7719 GN=ci-zf(c2h2)-87 PE=4 SV=1	36.5185	265687300
KFF	441.25	137.86	Sodium channel protein OS=Ciona intestinalis OX=7719 PE=3 SV=2	33.7572	3564900
ILH	382.245	199.63	Rap-GAP domain-containing protein OS=Ciona intestinalis OX=7719 PE=4 SV=2	16.1337	3005700
FPR	419.24	141.12	Uncharacterized protein OS=Ciona intestinalis OX=7719 PE=4 SV=1	16.3829	839590
FHF	450.214	203.28	Uncharacterized protein OS=Ciona intestinalis OX=7719 PE=4 SV=1	36.8579	29152000
YPV	378.202	137.71	Uncharacterized protein OS=Ciona intestinalis OX=7719 PE=4 SV=1	25.5925	16573500
YGF	386.171	187.13	Peptidase_M28 domain-containing protein OS=Ciona intestinalis OX=7719 PE=4 SV=1	37.4571	208665600
WLP	415.234	241.4	NADH:ubiquinone reductase (H(+)-translocating) OS=Polycarpa mytiligera OX=569436 GN=nad5 PE=4 SV=1	46.5223	95123300
WLN	432.224	126	Uncharacterized protein OS=Ciona intestinalis OX=7719 GN=ci-zf(c2h2)-87 PE=4 SV=1	32.8374	14125400
PYK	407.229	132.16	Uncharacterized protein OS=Ciona intestinalis OX=7719 GN=LOC100179130 PE=3 SV=2	15.6898	1517300
LYPY	555.281	210.62	Uncharacterized protein OS=Ciona intestinalis OX=7719 GN=ci-zf(c2h2)-87 PE=4 SV=1	39.1506	16969100
LYP	392.218	201.36	Uncharacterized protein OS=Ciona intestinalis OX=7719 GN=ci-zf(c2h2)-87 PE=4 SV=1	29.1061	37802300
Fraction B identified 243 peptides
Peptide	Mass	Score	Protein Name	Scan Time	intensity
LFGI	449.276	256.6	Protein transport protein Sec61 subunit alpha OS=Halocynthia roretzi OX=7729 PE=2 SV=1	58.2889	3657400
LAF	350.207	226.65	Uncharacterized protein OS=Ciona intestinalis OX=7719 GN=ci-zf(c2h2)-87 PE=4 SV=1	42.2105	98545900
HLY	432.224	184.53	Rap-GAP domain-containing protein OS=Ciona intestinalis OX=7719 PE=4 SV=2	15.6755	4014500
GSAYYYKG	908.415	113.48	Uncharacterized protein OS=Ciona intestinalis OX=7719 GN=LOC100177516 PE=4 SV=2	28.4991	29775000
FWP	449.218	131.39	Cytochrome b OS=Polycarpa mytiligera OX=569436 GN=cob PE=3 SV=1	53.4495	719240
FGGY	443.192	289.36	Aldedh domain-containing protein OS=Ciona intestinalis OX=7719 GN=LOC100175707 PE=3 SV=2	30.8554	4988000
WIV	417.25	122.58	Rap-GAP domain-containing protein OS=Ciona intestinalis OX=7719 PE=4 SV=2	54.0337	7084300
TFY	430.197	173.72	Uncharacterized protein OS=Ciona intestinalis OX=7719 PE=4 SV=1	32.9065	5958300
PFTLP	574.323	121.8	Connectin OS=Ciona intestinalis OX=7719 GN=CON PE=2 SV=1	52.979	1797100
PFPE	489.234	140.97	Hemicentin-1 OS=Phallusia mammillata OX=59560 GN=Hmcn1-001 PE=2 SV=1	48.1576	6106800000
LVGY	451.255	114.75	3-oxoacyl-[acyl-carrier-protein] reductase OS=Ciona intestinalis OX=7719 PE=4 SV=1	29.0489	1073300
LFC[+57.021]	439.201	173.47	Sodium channel protein OS=Ciona intestinalis OX=7719 PE=3 SV=2	30.9274	2105200
LC[+57.021]F	439.201	181.84	Uncharacterized protein OS=Ciona intestinalis OX=7719 PE=3 SV=2	43.249	2410900
IYGYT	616.298	135.43	Uncharacterized protein OS=Ciona intestinalis OX=7719 PE=4 SV=2	35.6821	1265500
FGW	409.187	139.01	Cytochrome b OS=Polycarpa mytiligera OX=569436 GN=cob PE=3 SV=1	51.8383	9989700
EGPG	359.156	118.94	Uncharacterized protein OS=Ciona intestinalis OX=7719 GN=LOC100179607 PE=3 SV=2	30.6271	86998100
YPL	392.218	187.12	Uncharacterized protein OS=Ciona intestinalis OX=7719 GN=ci-zf(c2h2)-87 PE=4 SV=1	33.2485	470580000
YFA	400.187	177.83	Dolichyl-diphosphooligosaccharide--protein glycotransferase OS=Ciona intestinalis OX=7719 GN=LOC100177361 PE=3 SV=2	27.6388	6259400
WGP	359.171	161.95	Uncharacterized protein OS=Ciona intestinalis OX=7719 GN=LOC100179130 PE=3 SV=2	35.5175	61204400
VVF	364.223	186.07	Sodium channel protein OS=Ciona intestinalis OX=7719 PE=3 SV=2	37.7713	141620000
VFV	364.223	144.92	NADH:ubiquinone reductase (H(+)-translocating) OS=Polycarpa mytiligera OX=569436 GN=nad5 PE=4 SV=1	34.0599	11350300
MWL	449.222	112.51	NADH-ubiquinone oxidoreductase chain 5 OS=Halocynthia spinosa OX=569430 GN=nad5 PE=3 SV=1	56.5998	3609500
LYFL	555.318	157.18	NADH:ubiquinone reductase (H(+)-translocating) OS=Polycarpa mytiligera OX=569436 GN=nad5 PE=4 SV=1	58.9987	1702500
LYF	442.234	240.83	NADH:ubiquinone reductase (H(+)-translocating) OS=Polycarpa mytiligera OX=569436 GN=nad5 PE=4 SV=1	48.825	265194200
LFQ	407.229	124.46	NADH:ubiquinone reductase (H(+)-translocating) OS=Polycarpa mytiligera OX=569436 GN=nad5 PE=4 SV=1	26.7165	2845800
IRL	401.287	108.97	Rap-GAP domain-containing protein OS=Ciona intestinalis OX=7719 PE=4 SV=2	25.9194	12416600
EYF	458.192	124.65	NADH:ubiquinone reductase (H(+)-translocating) OS=Polycarpa mytiligera OX=569436 GN=nad5 PE=4 SV=1	40.0526	3589100
YPY	442.197	185.41	Uncharacterized protein OS=Ciona intestinalis OX=7719 GN=ci-zf(c2h2)-87 PE=4 SV=1	28.7425	2060000
Fraction B identified 243 peptides
Peptide	Mass	Score	Protein Name	Scan Time	intensity
YFP	426.202	262.96	Sodium channel protein OS=Ciona intestinalis OX=7719 PE=3 SV=2	37.2631	10571200
YDF	444.176	124.44	FACT complex subunit SSRP1 OS=Ciona intestinalis OX=7719 GN=SSRP1 PE=2 SV=1	38.9759	1354300
WTP	403.198	224.29	Uncharacterized protein OS=Ciona intestinalis OX=7719 PE=3 SV=2	32.4635	13481400
VVYY	543.281	118.46	Uncharacterized protein OS=Ciona intestinalis OX=7719 PE=4 SV=2	35.6329	1771600
VPF	362.207	160.89	Uncharacterized protein OS=Ciona intestinalis OX=7719 PE=4 SV=1	35.7922	75078000
VIW	417.25	152.3	Uncharacterized protein OS=Ciona intestinalis OX=7719 PE=4 SV=1	51.6311	14991000
VGGY	395.192	126.34	NADH-ubiquinone oxidoreductase chain 5 OS=Halocynthia spinosa OX=569430 GN=nad5 PE=3 SV=1	18.5983	2083400
VAF	336.192	176.73	Peptidase_M28 domain-containing protein OS=Ciona intestinalis OX=7719 PE=4 SV=1	32.3362	43056100
TIF	380.218	207.85	Rap-GAP domain-containing protein OS=Ciona intestinalis OX=7719 PE=4 SV=2	43.0305	13349000
RVPFNH	769.41	120.35	SWIM-type domain-containing protein OS=Ciona intestinalis OX=7719 PE=4 SV=2	19.7191	4976900
LYY	458.229	201.41	NADH:ubiquinone reductase (H(+)-translocating) OS=Polycarpa mytiligera OX=569436 GN=nad5 PE=4 SV=1	36.4283	71805100
LSF	366.202	145	Rap-GAP domain-containing protein OS=Ciona intestinalis OX=7719 PE=4 SV=2	40.1852	45979000
LNF	393.213	177.94	Sodium channel protein OS=Ciona intestinalis OX=7719 PE=3 SV=2	38.6052	32031000
LM[+15.995]F	426.206	111.24	Sodium channel protein OS=Ciona intestinalis OX=7719 PE=3 SV=2	41.2643	4711500
LLFF	539.323	118.73	NADH:ubiquinone reductase (H(+)-translocating) OS=Polycarpa mytiligera OX=569436 GN=nad5 PE=4 SV=1	62.2382	573140
LHF	416.229	224.48	Uncharacterized protein OS=Ciona intestinalis OX=7719 PE=4 SV=1	29.9314	11394550
LAW	389.218	191.04	Uncharacterized protein OS=Ciona intestinalis OX=7719 PE=4 SV=1	46.5156	203777800
ISW	405.213	176.48	NADH:ubiquinone reductase (H(+)-translocating) OS=Polycarpa mytiligera OX=569436 GN=nad5 PE=4 SV=1	44.6893	75067800
INW	432.224	168.01	Sodium channel protein OS=Ciona intestinalis OX=7719 PE=3 SV=2	44.7836	2521300
FQY	457.208	136.44	NADH:ubiquinone reductase (H(+)-translocating) OS=Polycarpa mytiligera OX=569436 GN=nad5 PE=4 SV=1	33.8316	11587000
FPS	350.171	128.25	Sphingomyelin phosphodiesterase (Fragment) OS=Ciona intestinalis OX=7719 PE=2 SV=1	20.859	11756000
FFP	410.207	166.62	Uncharacterized protein OS=Ciona intestinalis OX=7719 PE=4 SV=1	45.5856	23080400
FDY	444.176	130.08	Transporter OS=Ciona intestinalis OX=7719 PE=3 SV=2	34.9226	1151700
FAY	400.187	200.64	Cytochrome b OS=Polycarpa mytiligera OX=569436 GN=cob PE=3 SV=1	34.4952	18432900
EGPV	401.203	110.75	Cytochrome c oxidase subunit 1 OS=Polyandrocarpa misakiensis OX=7723 GN=PmCOX1 PE=2 SV=1	44.214	123970000
AYF	400.187	225.63	Dolichyl-diphosphooligosaccharide--protein glycotransferase OS=Ciona intestinalis OX=7719 GN=LOC100177361 PE=3 SV=2	38.7444	3127000
WPV	401.218	113.32	Leucyl-tRNA synthetase OS=Ciona intestinalis OX=7719 GN=LOC100179230 PE=3 SV=1	43.1601	123970000
WGPG	416.193	172.75	Uncharacterized protein OS=Ciona intestinalis OX=7719 PE=4 SV=1	32.0799	260216900
Fraction B identified 243 peptides
Peptide	Mass	Score	Protein Name	Scan Time	intensity
VTW	405.213	141.09	Uncharacterized protein OS=Ciona intestinalis OX=7719 PE=4 SV=1	38.3036	50055000
VILH	481.313	122.05	Peptidase_M28 domain-containing protein OS=Ciona intestinalis OX=7719 PE=4 SV=1	16.1175	14118000
VFY	428.218	246.61	Uncharacterized protein OS=Ciona intestinalis OX=7719 PE=4 SV=1	37.623	9283800
VDW	419.192	162.64	Leucyl-tRNA synthetase OS=Ciona intestinalis OX=7719 GN=LOC100179230 PE=3 SV=1	39.3012	6325000
RVPNFH	769.41	120.35	Uncharacterized protein OS=Ciona intestinalis OX=7719 PE=4 SV=2	19.7191	4976900
NLF	393.213	215.44	Rap-GAP domain-containing protein OS=Ciona intestinalis OX=7719 PE=4 SV=2	44.6756	10106000
LGY	352.187	195.39	NADH:ubiquinone reductase (H(+)-translocating) OS=Polycarpa mytiligera OX=569436 GN=nad5 PE=4 SV=1	26.3073	58972400
FFA	384.192	125.38	Uncharacterized protein OS=Ciona intestinalis OX=7719 PE=4 SV=1	37.1694	2249700
YYV	444.213	104	Uncharacterized protein OS=Ciona intestinalis OX=7719 PE=4 SV=1	32.6077	6937000
YTY	446.192	118.08	Uncharacterized protein OS=Ciona intestinalis OX=7719 PE=4 SV=1	25.7536	8901300
YSY	432.176	143.98	Uncharacterized protein OS=Ciona intestinalis OX=7719 PE=4 SV=1	25.3162	1267300
YFH	466.209	115.41	Leucyl-tRNA synthetase OS=Ciona intestinalis OX=7719 GN=LOC100179230 PE=3 SV=1	16.799	22874000
WLT	419.229	181.56	Uncharacterized protein OS=Ciona intestinalis OX=7719 GN=LOC100179607 PE=3 SV=2	39.1319	6325000
WGF	409.187	137.07	AA_permease_C domain-containing protein OS=Ciona intestinalis OX=7719 PE=4 SV=2	55.406	7806400
VVGVIG	543.35	208.47	Uncharacterized protein OS=Ciona intestinalis OX=7719 GN=LOC100177118 PE=3 SV=2	32.2018	11523000
TPY	380.182	132.45	Rap-GAP domain-containing protein OS=Ciona intestinalis OX=7719 PE=4 SV=2	17.5891	2686800
SPW	389.182	111.34	Uncharacterized protein OS=Ciona intestinalis OX=7719 PE=4 SV=1	33.4254	100660000
PYYG	499.219	128.59	Cytochrome b OS=Polycarpa mytiligera OX=569436 GN=cob PE=3 SV=1	27.2928	5537200
PIFF	523.292	116.75	Transporter OS=Ciona intestinalis OX=7719 PE=3 SV=2	40.8335	82007000
LVLL	457.338	105.54	Rap-GAP domain-containing protein OS=Ciona intestinalis OX=7719 PE=4 SV=2	54.3288	2649100
LVIW	530.334	199.71	Uncharacterized protein OS=Ciona intestinalis OX=7719 PE=4 SV=1	59.4501	2165120
LLFY	555.318	184.98	Uncharacterized protein OS=Ciona intestinalis OX=7719 PE=4 SV=1	58.1496	2876000
IRY	451.266	194.38	Cytochrome b OS=Clavelina oblonga OX=286222 GN=cytb PE=3 SV=1	18.6622	27551500
GYPAFA	625.298	141.86	Phosphorylase b kinase regulatory subunit OS=Ciona intestinalis OX=7719 PE=3 SV=2	43.3044	2351600
FYV	442.234	212.79	Sodium channel protein OS=Ciona intestinalis OX=7719 PE=3 SV=2	52.5867	1193500
DYF	444.176	161.46	Uncharacterized protein OS=Ciona intestinalis OX=7719 PE=4 SV=1	42.1687	6936800
APW	373.187	160.21	Dolichyl-diphosphooligosaccharide--protein glycotransferase OS=Ciona intestinalis OX=7719 GN=LOC100177361 PE=3 SV=2	35.5106	4172000
TVF	366.202	123.47	Uncharacterized protein OS=Ciona intestinalis OX=7719 PE=4 SV=1	41.6032	19856000
Fraction B identified 243 peptides
Peptide	Mass	Score	Protein Name	Scan Time	intensity
PYPF	523.255	129.44	Uncharacterized protein OS=Ciona intestinalis OX=7719 GN=ci-zf(c2h2)-87 PE=4 SV=1	45.3962	1054900
LVW	417.25	185.4	Uncharacterized protein OS=Ciona intestinalis OX=7719 PE=4 SV=1	51.1183	14991000
LLP	342.239	162.86	Uncharacterized protein OS=Ciona intestinalis OX=7719 GN=ci-zf(c2h2)-87 PE=4 SV=1	29.429	42397500
LDW	433.208	151.51	Uncharacterized protein OS=Ciona intestinalis OX=7719 PE=4 SV=1	47.4041	11133600
LAPH	437.251	224.21	Uncharacterized protein OS=Ciona intestinalis OX=7719 PE=4 SV=1	12.502	22588200
FRP	419.24	128.81	DUF3677 domain-containing protein OS=Ciona intestinalis OX=7719 PE=4 SV=1	16.0799	13832000
FPY	426.202	159.35	Uncharacterized protein OS=Ciona intestinalis OX=7719 GN=ci-zf(c2h2)-87 PE=4 SV=1	39.6547	2558800
EGLQ	446.224	128.09	Uncharacterized protein OS=Ciona intestinalis OX=7719 PE=4 SV=1	33.336	8167200
WVT	405.213	120.2	Uncharacterized protein OS=Ciona intestinalis OX=7719 PE=4 SV=1	30.0199	9432600
WSY	455.192	144.05	Uncharacterized protein OS=Ciona intestinalis OX=7719 PE=4 SV=1	41.9922	52332000
WNP	416.193	145.28	Uncharacterized protein OS=Ciona intestinalis OX=7719 PE=4 SV=1	28.7062	6729000
VWT	405.213	106.56	Peptidase_M28 domain-containing protein OS=Ciona intestinalis OX=7719 PE=4 SV=1	26.9693	3095400
VVY	380.218	187.02	Rap-GAP domain-containing protein OS=Ciona intestinalis OX=7719 PE=4 SV=2	23.7212	18184000
VIYF	541.302	126.12	Sodium channel protein OS=Ciona intestinalis OX=7719 PE=3 SV=2	50.286	1973800
MPF	394.18	107.98	Uncharacterized protein OS=Ciona intestinalis OX=7719 PE=4 SV=1	42.6686	1840500
LYFP	539.286	240.5	Sodium channel protein OS=Ciona intestinalis OX=7719 PE=3 SV=2	52.6746	23864400
LGF	336.192	187.57	NADH:ubiquinone reductase (H(+)-translocating) OS=Polycarpa mytiligera OX=569436 GN=nad5 PE=4 SV=1	38.9665	60419000
LFFP	523.292	130.65	Uncharacterized protein OS=Ciona intestinalis OX=7719 PE=4 SV=1	57.6597	2727200
IWH	455.24	134.7	Uncharacterized protein OS=Ciona intestinalis OX=7719 GN=ci-zf(c2h2)-87 PE=4 SV=1	18.8482	35771000
IFY	442.234	215.87	NADH:ubiquinone reductase (H(+)-translocating) OS=Polycarpa mytiligera OX=569436 GN=nad5 PE=4 SV=1	41.1608	229596800
FSP	350.171	107.32	Uncharacterized protein OS=Ciona intestinalis OX=7719 PE=4 SV=1	23.5156	18703000
FPF	410.207	138.76	Uncharacterized protein OS=Ciona intestinalis OX=7719 GN=ci-zf(c2h2)-87 PE=4 SV=1	55.843	4821850
EGPI	415.219	107.18	CYTOSOL_AP domain-containing protein OS=Ciona intestinalis OX=7719 PE=3 SV=2	52.1648	14991000
YTF	430.197	230.03	Cytochrome b OS=Polycarpa mytiligera OX=569436 GN=cob PE=3 SV=1	38.5398	54486500
YPL	392.218	160.02	Uncharacterized protein OS=Ciona intestinalis OX=7719 PE=4 SV=1	32.8037	5717800
WVF	451.234	148.85	Cytochrome b OS=Polycarpa mytiligera OX=569436 GN=cob PE=3 SV=1	58.1645	14445000
WGI	375.203	103.06	Uncharacterized protein OS=Ciona intestinalis OX=7719 PE=4 SV=1	49.8941	18791000
WELQ	575.282	133.95	Delta(24)-sterol reductase OS=Ciona intestinalis OX=7719 GN=LOC100181233 PE=4 SV=1	40.5464	1183400
Fraction B identified 243 peptides
Peptide	Mass	Score	Protein Name	Scan Time	intensity
VYY	444.213	156.15	Uncharacterized protein OS=Ciona intestinalis OX=7719 PE=3 SV=2	29.6059	10393000
VTY	382.197	131.83	Sodium channel protein OS=Ciona intestinalis OX=7719 PE=3 SV=2	20.6706	1268300
VGW	361.187	142.18	Uncharacterized protein OS=Ciona intestinalis OX=7719 PE=4 SV=1	36.9251	136890000
SYL	382.197	101.06	NADH:ubiquinone reductase (H(+)-translocating) OS=Polycarpa mytiligera OX=569436 GN=nad5 PE=4 SV=1	31.1481	6314400
SWP	389.182	272.08	Homeobox protein AHox1 OS=Halocynthia roretzi OX=7729 GN=AHOX1 PE=2 SV=1	33.941	100660000
LGY	352.187	214.52	NADH:ubiquinone reductase (H(+)-translocating) OS=Polycarpa mytiligera OX=569436 GN=nad5 PE=4 SV=1	25.1806	101635000
LFH	416.229	152.22	NADH:ubiquinone reductase (H(+)-translocating) OS=Polycarpa mytiligera OX=569436 GN=nad5 PE=4 SV=1	15.2643	11812900
LALL	429.307	144.24	Sodium channel protein OS=Ciona intestinalis OX=7719 PE=3 SV=2	50.3288	14040000
IADP	415.219	147.2	Coronin OS=Ciona intestinalis OX=7719 PE=3 SV=2	43.1858	17421000
FTN	414.202	199.73	Uncharacterized protein OS=Ciona intestinalis OX=7719 PE=4 SV=1	49.3796	119490000
FSVS	439.219	116.58	AA_permease_C domain-containing protein OS=Ciona intestinalis OX=7719 PE=4 SV=2	52.1715	1305600
FPV	362.207	102.15	Uncharacterized protein OS=Ciona intestinalis OX=7719 PE=4 SV=1	36.8481	37539000
FGY	386.171	152.73	Cytochrome b OS=Polycarpa mytiligera OX=569436 GN=cob PE=3 SV=1	33.7598	42588000
YTI	396.213	119.07	NADH:ubiquinone reductase (H(+)-translocating) OS=Polycarpa mytiligera OX=569436 GN=nad5 PE=4 SV=1	34.0804	2471700
YLGR	508.288	110.75	Acetyl-CoA carboxylase OS=Ciona intestinalis OX=7719 PE=4 SV=2	12.6901	1584600
YFQ	457.208	143.31	Uncharacterized protein OS=Ciona intestinalis OX=7719 PE=4 SV=1	23.6407	6892000
VQF	393.213	116.42	Uncharacterized protein OS=Ciona intestinalis OX=7719 PE=4 SV=1	32.419	2179200
VPL	328.223	117.5	Uncharacterized protein OS=Ciona intestinalis OX=7719 GN=LOC100179130 PE=3 SV=2	24.6738	29893100
SYF	416.182	248.15	Uncharacterized protein OS=Ciona intestinalis OX=7719 PE=4 SV=1	38.1564	1262700
IGGY	409.208	290.28	Uncharacterized protein OS=Ciona intestinalis OX=7719 PE=3 SV=2	23.9477	5310400
IFL	392.254	207.59	Rap-GAP domain-containing protein OS=Ciona intestinalis OX=7719 PE=4 SV=2	54.385	261957800
FYR	485.251	114.3	Uncharacterized protein OS=Ciona intestinalis OX=7719 PE=4 SV=1	24.3534	17033000
FTE	396.176	164.5	Uncharacterized protein OS=Ciona intestinalis OX=7719 PE=4 SV=1	36.8537	18628900
AFI	350.207	170.92	NADH:ubiquinone reductase (H(+)-translocating) OS=Polycarpa mytiligera OX=569436 GN=nad5 PE=4 SV=1	42.738	20125000
YYP	442.197	240.33	[Histone H3]-trimethyl-L-lysine(4) demethylase OS=Polyandrocarpa misakiensis OX=7723 GN=KDM5 PE=2 SV=1	25.6543	790985900
YFG	386.171	116.59	Uncharacterized protein OS=Ciona intestinalis OX=7719 PE=4 SV=1	26.4065	6509300
VYR	437.251	102.48	Uncharacterized protein OS=Ciona intestinalis OX=7719 PE=4 SV=1	13.6747	4556200
PFAVP	530.297	329.57	DNA primase OS=Ciona intestinalis OX=7719 GN=LOC100176054 PE=3 SV=1	44.5697	38580000
Fraction B identified 243 peptides
Peptide	Mass	Score	Protein Name	Scan Time	intensity
LLGR	458.308	143.77	Uncharacterized protein OS=Ciona intestinalis OX=7719 PE=4 SV=1	12.7559	1224600
LIW	431.265	193.09	Uncharacterized protein OS=Ciona intestinalis OX=7719 PE=4 SV=1	54.923	224181000
IYSY	545.261	155.9	Uncharacterized protein OS=Ciona intestinalis OX=7719 PE=4 SV=1	33.9466	1233200
IWS	405.213	114.07	Rap-GAP domain-containing protein OS=Ciona intestinalis OX=7719 PE=4 SV=2	29.4967	6500800
IGW	375.203	183.91	Uncharacterized protein OS=Ciona intestinalis OX=7719 PE=4 SV=1	43.705	197900900
FSW	439.198	225.72	Rap-GAP domain-containing protein OS=Ciona intestinalis OX=7719 PE=4 SV=2	52.1715	1305600
TGYR	496.251	103.09	FAD-binding PCMH-type domain-containing protein OS=Ciona intestinalis OX=7719 GN=LOC100181207 PE=3 SV=1	18.8602	2646900
IWK	446.276	114.4	Transporter OS=Ciona intestinalis OX=7719 PE=3 SV=2	17.1459	1066200
WVI	417.25	154.08	Delta(24)-sterol reductase OS=Ciona intestinalis OX=7719 GN=LOC100181233 PE=4 SV=1	52.1701	14991000
WSP	389.182	262	Sphingomyelin phosphodiesterase (Fragment) OS=Ciona intestinalis OX=7719 PE=2 SV=1	35.5298	412806200
WAF	423.203	135.85	Transporter OS=Ciona intestinalis OX=7719 PE=3 SV=2	55.4087	45002500
VIY	394.234	143.83	NADH:ubiquinone reductase (H(+)-translocating) OS=Polycarpa mytiligera OX=569436 GN=nad5 PE=4 SV=1	30.9967	7212200
VFPS	449.24	225.26	Actin, cytoplasmic OS=Styela plicata OX=7726 PE=3 SV=1	26.8074	26883200
VAW	375.203	173.03	Transporter OS=Ciona intestinalis OX=7719 PE=3 SV=2	38.4919	36180000
QFY	457.208	173.02	Sphingomyelin phosphodiesterase (Fragment) OS=Ciona intestinalis OX=7719 PE=2 SV=1	33.7654	9406400
LQF	407.229	112.38	Peptidase_M28 domain-containing protein OS=Ciona intestinalis OX=7719 PE=4 SV=1	41.3743	10961000
KNY	424.219	140.63	Leucyl-tRNA synthetase OS=Ciona intestinalis OX=7719 GN=LOC100179230 PE=3 SV=1	16.9449	2766100
FYP	426.202	257.35	Uncharacterized protein OS=Ciona intestinalis OX=7719 PE=4 SV=1	33.8302	3484900
AFY	400.187	212.21	Dolichyl-diphosphooligosaccharide--protein glycotransferase OS=Ciona intestinalis OX=7719 GN=LOC100177361 PE=3 SV=2	34.7705	26936000
-.PYF	426.202	211.1	Sodium channel protein OS=Ciona intestinalis OX=7719 PE=3 SV=2	43.341	4870000

## Sheet: Fraction B1
Table S1. Identification result of fraction B and fraction B1 by LC-MS/MS.
Fraction B reacted with DPPH identified 13 peptides
Peptide	Mass	Score	Protein Name	Scan Time	intensity
LFV	378.239	132.12	NADH:ubiquinone reductase (H(+)-translocating) OS=Polycarpa mytiligera OX=569436 GN=nad5 PE=4 SV=1	40.7142	1191100
LLW	431.265	167.47	NADH:ubiquinone reductase (H(+)-translocating) OS=Polycarpa mytiligera OX=569436 GN=nad5 PE=4 SV=1	52.8916	8024500
FGF	370.176	131.56	NADH:ubiquinone reductase (H(+)-translocating) OS=Polycarpa mytiligera OX=569436 GN=nad5 PE=4 SV=1	48.4744	6870100
VFL	378.239	120.43	NADH:ubiquinone reductase (H(+)-translocating) OS=Polycarpa mytiligera OX=569436 GN=nad5 PE=4 SV=1	49.4921	3106500
LWL	431.265	140.53	NADH:ubiquinone reductase (H(+)-translocating) OS=Polycarpa mytiligera OX=569436 GN=nad5 PE=4 SV=1	56.5614	2832500
YLY	458.229	151.31	Uncharacterized protein OS=Ciona intestinalis OX=7719 GN=LOC100179130 PE=3 SV=2	36.3907	2115000
WLP	415.234	129.88	NADH:ubiquinone reductase (H(+)-translocating) OS=Polycarpa mytiligera OX=569436 GN=nad5 PE=4 SV=1	47.0098	1377600
LSF	366.202	118.58	Uncharacterized protein OS=Ciona intestinalis OX=7719 GN=LOC100179130 PE=3 SV=2	40.3547	1686000
VYF	428.218	191.81	NADH:ubiquinone reductase (H(+)-translocating) OS=Polycarpa mytiligera OX=569436 GN=nad5 PE=4 SV=1	43.0151	10936000
LYF	442.234	253.74	NADH:ubiquinone reductase (H(+)-translocating) OS=Polycarpa mytiligera OX=569436 GN=nad5 PE=4 SV=1	48.9868	9039400
LYY	458.229	185.25	NADH:ubiquinone reductase (H(+)-translocating) OS=Polycarpa mytiligera OX=569436 GN=nad5 PE=4 SV=1	36.6897	6706840
ISW	405.213	182.75	NADH:ubiquinone reductase (H(+)-translocating) OS=Polycarpa mytiligera OX=569436 GN=nad5 PE=4 SV=1	44.5216	3034800
LGF	336.192	139.75	NADH:ubiquinone reductase (H(+)-translocating) OS=Polycarpa mytiligera OX=569436 GN=nad5 PE=4 SV=1	40.752	3665900

## Sheet: Screen
Table S1. Identification result of fraction B and fraction B1 by LC-MS/MS.
Nine down-regulated differential peptides
				Intensity ( 106 )
Peptide	Mass	Score	Scan Time	Fraction B	Fraction B1	Scavenging rate (%)	Remark
LFV	378.239	132.12	40.7142	185.134	1.1911	0.993566	Top 6
WLP	415.234	129.88	47.0098	95.1233	1.3776	0.985518
FGF	370.176	131.56	48.4744	334.535	6.8701	0.979464
VFL	378.239	120.43	49.4921	122.567	3.1065	0.974655
ISW	405.213	182.75	44.5216	75.0678	3.0348	0.959573
LGF	336.192	139.75	40.752	60.419	3.6659	0.939325
LYF	442.234	253.74	48.9868	120.434	9.0394	0.924943
LYY	458.229	185.25	36.6897	71.8051	6.70684	0.906597
LWL	431.265	140.53	56.5614	10.2397	2.8325	0.723381
