# Supplementary material for: Identification of novel antioxidant peptides from sea squirt (Halocynthia roretzi) and its neuroprotective effect in 6-OHDA-induced neurotoxicity
Source: Royal Society of Chemistry journal article supplement (doi:10.1039/d2fo00729k), 2022-01-01
Supplement: d2fo00729k3.pdf [file d2fo00729k3.pdf]

**Table S2. Differential gene expression between groups (Gene Set).**

| Gene name      | 6-OHDA/Control      |          |          | WLP/6-OHDA          |             |          |
|----------------|---------------------|----------|----------|---------------------|-------------|----------|
|                | Log <sub>2</sub> FC | P-value  | Regulate | Log <sub>2</sub> FC | P-value     | Regulate |
| AABR07027407.1 | -1.210787595        | 1.72E-07 | down     | 0.700869893         | 0.008180424 | up       |
| AABR07045684.1 | -0.518370959        | 0.015464 | down     | 0.477516853         | 0.035958121 | up       |
| AABR07053749.2 | -0.657664532        | 0.012732 | down     | 1.497456635         | 0.033232495 | up       |
| AABR07055191.1 | -5.897666767        | 7.71E-05 | down     | 5.377483621         | 0.000603228 | up       |
| AC118772.2     | -3.197521268        | 0.000815 | down     | 4.336310715         | 1.68E-07    | up       |
| Alg10          | -0.277916063        | 0.01805  | down     | 0.301494224         | 0.012359887 | up       |
| Asph           | -0.649078447        | 6.67E-14 | down     | 0.349028364         | 0.000270967 | up       |
| Atp4a          | -3.755203177        | 6.33E-20 | down     | 1.807756986         | 0.002315587 | up       |
| Banp           | -0.273560252        | 0.003384 | down     | 0.404488758         | 3.10E-05    | up       |
| Cblb           | -0.503696922        | 7.01E-06 | down     | 0.303796142         | 0.015765334 | up       |
| Ccdc77         | -0.623461511        | 1.66E-06 | down     | 0.374955801         | 0.010004113 | up       |
| Chd7           | -0.328372985        | 0.003092 | down     | 0.266804092         | 0.022510979 | up       |
| Dcun1d2        | -0.778250269        | 8.47E-05 | down     | 0.515453133         | 0.02011667  | up       |
| Dgcr2          | -0.441228343        | 4.96E-05 | down     | 0.321586185         | 0.002002275 | up       |
| Egr1           | -1.335410694        | 5.13E-33 | down     | 0.65645573          | 7.44E-06    | up       |
| Emc2           | -0.319099531        | 0.005045 | down     | 0.284682729         | 0.0195004   | up       |
| Exosc6         | -2.396346653        | 1.03E-14 | down     | 1.902971707         | 0.040745974 | up       |
| Fam220a        | -0.286585096        | 0.010482 | down     | 0.264206434         | 0.032096729 | up       |
| Fkbp2          | -0.312093686        | 1.34E-06 | down     | 0.340614657         | 4.42E-06    | up       |
| Gemin6         | -0.306529933        | 0.011638 | down     | 0.273009611         | 0.037089007 | up       |
| Glt8d1         | -0.465636816        | 5.63E-06 | down     | 0.316664084         | 0.003612076 | up       |
| Hmgb211        | -1.472208008        | 3.05E-07 | down     | 0.774892943         | 0.021777284 | up       |
| Igfbp5         | -0.484062365        | 0.001238 | down     | 0.586563225         | 3.31E-06    | up       |
| Ina            | -0.493825655        | 0.000294 | down     | 0.294886166         | 0.046047886 | up       |
| Kcnj8          | -0.595033307        | 0.04534  | down     | 0.731532319         | 0.023606086 | up       |
| Knop1          | -0.346357257        | 0.022079 | down     | 0.391350427         | 0.014675398 | up       |
| Lats1          | -0.462243075        | 2.86E-08 | down     | 0.28041361          | 0.003060455 | up       |
| LOC102551606   | -0.563716908        | 1.23E-07 | down     | 0.346168278         | 0.001702463 | up       |
| LOC103689983   | -0.950255373        | 0.000548 | down     | 0.736972988         | 0.018746473 | up       |
| LOC103690006   | -0.372509705        | 0.001729 | down     | 0.684977405         | 8.79E-10    | up       |
| LOC108348082   | -0.285165348        | 0.011459 | down     | 0.456959414         | 0.001026934 | up       |
| Mgat5b         | -5.252286391        | 0.000668 | down     | 4.770314816         | 0.006629505 | up       |
| Mob3b          | -0.956733662        | 2.45E-06 | down     | 0.705508033         | 0.001721955 | up       |
| Msl1           | -0.283945907        | 5.92E-06 | down     | 0.36625271          | 2.92E-08    | up       |
| Mtss1          | -0.302934786        | 2.52E-05 | down     | 0.278131762         | 0.000541972 | up       |
| Mypop          | -0.618851463        | 0.000476 | down     | 0.392249343         | 0.035355397 | up       |
| Notch1         | -0.316212634        | 0.029137 | down     | 0.45702015          | 0.004111387 | up       |
| Nrn1           | -1.035930613        | 8.92E-15 | down     | 0.568026589         | 0.000406255 | up       |
| Prss53         | -0.488820685        | 0.023941 | down     | 0.595656255         | 0.008189735 | up       |
| Ranbp17        | -0.718296448        | 6.38E-05 | down     | 0.461214892         | 0.028693825 | up       |
| Rhob           | -0.679759496        | 6.66E-39 | down     | 0.485663515         | 4.13E-20    | up       |
| Sc1t1          | -0.349134614        | 0.034801 | down     | 0.361681238         | 0.039018973 | up       |
| Setd1b         | -0.346854855        | 0.0003   | down     | 0.279755563         | 0.006777877 | up       |
| Slc43a2        | -0.404909445        | 0.004323 | down     | 0.359344846         | 0.017450082 | up       |
| Slc6a17        | -0.837131693        | 3.59E-11 | down     | 0.410369437         | 0.004603381 | up       |

| Gene name      | 6-OHDA/Control      |           |          | WLP/6-OHDA          |             |          |
|----------------|---------------------|-----------|----------|---------------------|-------------|----------|
|                | Log <sub>2</sub> FC | P-value   | Regulate | Log <sub>2</sub> FC | P-value     | Regulate |
| Stk17b         | -0.301310942        | 0.003116  | down     | 0.268633044         | 0.014657059 | up       |
| Tbx2           | -0.70189134         | 1.66E-16  | down     | 0.276043257         | 0.0062224   | up       |
| Tcea3          | -1.638783459        | 6.83E-05  | down     | 0.994014181         | 0.041584226 | up       |
| Tfap2e         | -0.361808141        | 0.002491  | down     | 0.333749179         | 0.009366009 | up       |
| Wbp11          | -0.581761314        | 3.55E-15  | down     | 0.470061959         | 1.43E-09    | up       |
| Zfp600         | -0.596899806        | 4.12E-05  | down     | 0.356237324         | 0.025689743 | up       |
| 7SK            | 0.664722432         | 0.024476  | up       | -0.700242692        | 0.012325776 | down     |
| AABR07002969.1 | 0.944955429         | 2.81E-45  | up       | -0.285300212        | 1.02E-05    | down     |
| AABR07008940.1 | 0.409128104         | 0.00611   | up       | -0.735876727        | 7.70E-05    | down     |
| AABR07015066.1 | 1.733063501         | 1.91E-22  | up       | -0.654516932        | 0.000391064 | down     |
| AABR07024203.1 | 4.484227078         | 3.98E-07  | up       | -2.425348338        | 0.000255966 | down     |
| AABR07024381.1 | 0.646070775         | 0.03513   | up       | -0.799035868        | 0.015807029 | down     |
| AABR07044375.2 | 0.967290285         | 3.01E-11  | up       | -0.283531007        | 0.032647057 | down     |
| AABR07044383.1 | 0.342345568         | 0.003102  | up       | -0.280134361        | 0.024582112 | down     |
| AABR07047011.1 | 0.448947471         | 0.001663  | up       | -0.438329725        | 0.003825989 | down     |
| AABR07049286.1 | 0.42645316          | 0.013337  | up       | -0.427745225        | 0.037561512 | down     |
| AABR07055154.1 | 0.555634479         | 2.04E-05  | up       | -0.510394213        | 0.000229286 | down     |
| AC098459.2     | 0.945826092         | 0.004653  | up       | -0.806359413        | 0.020663062 | down     |
| Acot8          | 0.432472718         | 0.002886  | up       | -0.381839124        | 0.01292201  | down     |
| Adrb2          | 0.563673659         | 0.008051  | up       | -0.490582173        | 0.031795711 | down     |
| Als2cl         | 0.273472163         | 0.002354  | up       | -0.351314224        | 0.000436017 | down     |
| Amdhd2         | 0.838372931         | 2.16E-29  | up       | -0.391211925        | 3.64E-07    | down     |
| Avpi1          | 0.480007474         | 5.64E-11  | up       | -0.346621971        | 2.48E-05    | down     |
| Birc7          | 0.833995286         | 0.007123  | up       | -0.738537521        | 0.019789793 | down     |
| Bola3          | 0.407633656         | 0.001154  | up       | -0.271626533        | 0.034850899 | down     |
| Card9          | 0.537952427         | 3.40E-15  | up       | -0.33606478         | 1.82E-07    | down     |
| Casp12         | 1.457942243         | 1.08E-13  | up       | -0.504325823        | 0.010795857 | down     |
| Cd248          | 5.166084406         | 0.001527  | up       | -4.962840606        | 0.003138811 | down     |
| Coro6          | 0.552547089         | 5.88E-17  | up       | -0.368284371        | 9.44E-08    | down     |
| Cox6a2         | 2.401394827         | 3.04E-45  | up       | -0.410525878        | 0.001642744 | down     |
| Crcr1          | 3.204576205         | 2.53E-37  | up       | -0.482436419        | 0.005682295 | down     |
| Cst6           | 1.19046827          | 1.53E-109 | up       | -0.373288406        | 1.72E-10    | down     |
| Ctla2a         | 0.775764521         | 0.000806  | up       | -0.759343141        | 0.001537856 | down     |
| Cyp3a9         | 3.829770872         | 8.68E-08  | up       | -0.810112169        | 0.000283203 | down     |
| Dolk           | 0.321115191         | 0.02393   | up       | -0.355535526        | 0.009593795 | down     |
| Dpp7           | 0.408157147         | 5.45E-19  | up       | -0.387138516        | 3.68E-14    | down     |
| Ell            | 0.495335134         | 2.46E-09  | up       | -0.342232595        | 0.00013236  | down     |
| Eno2           | 0.319539135         | 2.86E-09  | up       | -0.271918135        | 1.72E-06    | down     |
| F10            | 1.166278812         | 0.000231  | up       | -0.583500227        | 0.047712186 | down     |
| Gbp2           | 0.892104274         | 1.10E-26  | up       | -0.303186587        | 0.000227086 | down     |
| Gcat           | 0.786712613         | 1.12E-13  | up       | -0.465865914        | 3.22E-05    | down     |
| Gm23639        | 1.260185159         | 3.95E-25  | up       | -0.286576915        | 0.004467254 | down     |
| Gpn2           | 0.53749629          | 0.000574  | up       | -0.365736123        | 0.021653281 | down     |
| Gsta1          | 4.606175041         | 2.78E-169 | up       | -0.351663928        | 6.51E-05    | down     |
| Gstp1          | 1.695373662         | 0         | up       | -0.392627495        | 7.36E-23    | down     |

| Gene name       | 6-OHDA/Control      |          |          | WLP/6-OHDA          |             |          |
|-----------------|---------------------|----------|----------|---------------------|-------------|----------|
|                 | Log <sub>2</sub> FC | P-value  | Regulate | Log <sub>2</sub> FC | P-value     | Regulate |
| Gstt1           | 0.395981855         | 0.025724 | up       | -0.516394164        | 0.005438805 | down     |
| Gstz1           | 0.404478666         | 0.017027 | up       | -0.364131405        | 0.041795964 | down     |
| Gzmb            | 0.490570412         | 0.001793 | up       | -0.3952892          | 0.017542502 | down     |
| Gzmb13          | 4.212457885         | 9.77E-07 | up       | -1.272134468        | 0.016931467 | down     |
| H1f2            | 0.906163309         | 1.12E-09 | up       | -0.415333804        | 0.003097339 | down     |
| H2aj            | 0.402214621         | 3.03E-05 | up       | -0.329986905        | 0.00114152  | down     |
| Herc3           | 0.655876863         | 1.46E-06 | up       | -0.30825731         | 0.024161171 | down     |
| Insyn1          | 0.494816025         | 2.12E-07 | up       | -0.298966172        | 0.001884633 | down     |
| Kif19           | 0.733058157         | 0.00431  | up       | -0.527368954        | 0.043450643 | down     |
| LOC100302465    | 1.653322257         | 1.32E-19 | up       | -0.600038696        | 0.000116424 | down     |
| LOC100912590    | 0.527892878         | 0.005923 | up       | -0.646001326        | 0.000474117 | down     |
| LOC103689945    | 0.503215556         | 1.11E-15 | up       | -0.316829937        | 0.000250792 | down     |
| LOC108348067    | 5.166084406         | 0.001527 | up       | -4.962840606        | 0.003138811 | down     |
| LOC108348096    | 0.314870237         | 0.004179 | up       | -0.281793371        | 0.010037992 | down     |
| Ly6d            | 1.634503313         | 1.41E-24 | up       | -1.095374673        | 1.84E-12    | down     |
| Lynx1           | 0.583832765         | 4.73E-11 | up       | -0.427502339        | 9.31E-06    | down     |
| Mgmt            | 1.808201197         | 4.77E-34 | up       | -0.302857501        | 0.017470479 | down     |
| Mt1             | 0.550356145         | 0.000124 | up       | -0.464300496        | 0.002257931 | down     |
| Nckipsd         | 0.579734309         | 2.17E-09 | up       | -0.27733104         | 0.004158905 | down     |
| NEWGENE_1304700 | 0.642031153         | 3.73E-06 | up       | -0.286956992        | 0.030766834 | down     |
| Pask            | 0.346788202         | 1.66E-05 | up       | -0.279149538        | 0.001052722 | down     |
| Phospho1        | 0.493707777         | 1.09E-08 | up       | -0.443237238        | 1.40E-06    | down     |
| Pinlyp          | 0.565693003         | 2.84E-05 | up       | -0.319699263        | 0.026234832 | down     |
| Plcg2           | 0.678672102         | 1.13E-07 | up       | -0.284663048        | 0.024601884 | down     |
| Pmm1            | 0.675303488         | 1.67E-47 | up       | -0.284151228        | 3.12E-09    | down     |
| Polr1e          | 0.381768847         | 0.005889 | up       | -0.387909635        | 0.013532633 | down     |
| Rab17           | 0.333067084         | 0.024674 | up       | -0.371550528        | 0.016890484 | down     |
| Rab33a          | 0.659150503         | 4.01E-12 | up       | -0.389856793        | 4.80E-05    | down     |
| Rapsn           | 0.287407828         | 0.005599 | up       | -0.691843558        | 3.36E-09    | down     |
| Rhpn2           | 0.288937875         | 1.61E-05 | up       | -0.273444803        | 0.000114097 | down     |
| Ripor2          | 0.282222093         | 0.040574 | up       | -0.345116905        | 0.022498477 | down     |
| Rnft2           | 0.472941615         | 0.001509 | up       | -0.453287843        | 0.003031127 | down     |
| Rpl13           | 0.341927138         | 0.01038  | up       | -0.32762883         | 0.018644779 | down     |
| Sema3b          | 0.617781948         | 3.83E-15 | up       | -0.33539862         | 1.32E-05    | down     |
| Siglec10        | 1.214696606         | 6.10E-18 | up       | -0.647113415        | 8.12E-07    | down     |
| Smim1011        | 0.437089956         | 0.001295 | up       | -0.361285702        | 0.007993066 | down     |
| Smlr1           | 0.763075191         | 8.36E-89 | up       | -0.733827318        | 7.78E-73    | down     |
| Stard8          | 2.359562326         | 0.000212 | up       | -1.290286997        | 0.018104227 | down     |
| Tac4            | 0.341062339         | 5.86E-07 | up       | -0.349896294        | 8.50E-07    | down     |
| Tmem63c         | 0.73397109          | 0.000207 | up       | -0.425925449        | 0.032248392 | down     |
| Trim63          | 0.432531388         | 5.22E-15 | up       | -0.320441426        | 3.36E-07    | down     |
| Wdr7            | 0.359298235         | 6.06E-12 | up       | -0.283327967        | 3.21E-07    | down     |
| Ydjc            | 0.309641988         | 0.00246  | up       | -0.300958721        | 0.010640045 | down     |
